# Supplementary material for: Zebrafish Transgenic Line huORFZ Is an Effective Living Bioindicator for Detecting Environmental Toxicants
Source: PubMed Central journal article supplement (PMC3940833; doi:10.1371/journal.pone.0090160), 2014-03-03

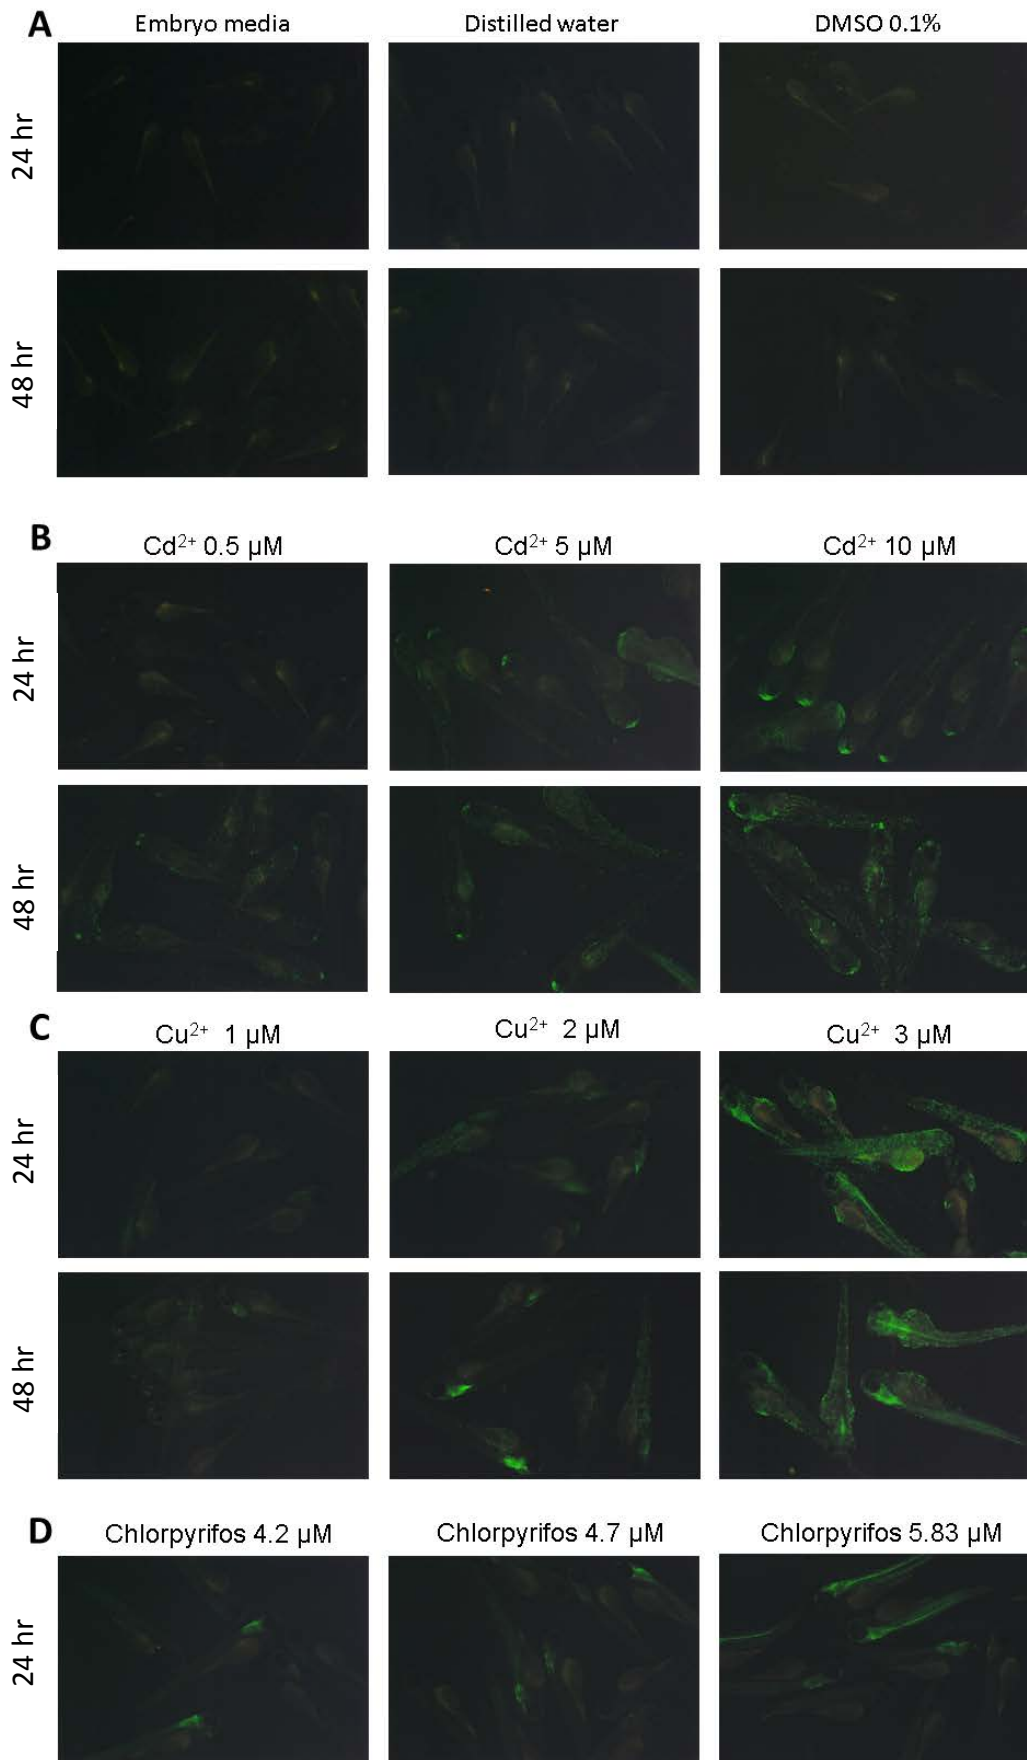

Supplement: pone.0090160.s001.pdf [file pone.0090160.s001.pdf]
