# Supplementary material for: Zebrafish Transgenic Line huORFZ Is an Effective Living Bioindicator for Detecting Environmental Toxicants
Source: PubMed Central journal article supplement (PMC3940833; doi:10.1371/journal.pone.0090160), 2014-03-03

Zn<sup>2+</sup>  
0.0002 mg/L

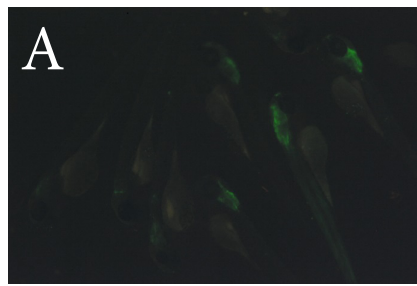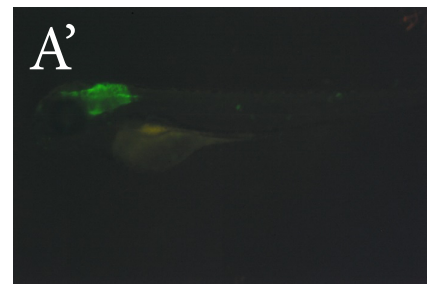

Ni<sup>2+</sup>  
0.0002 mg/L

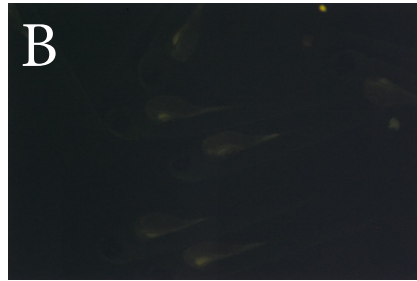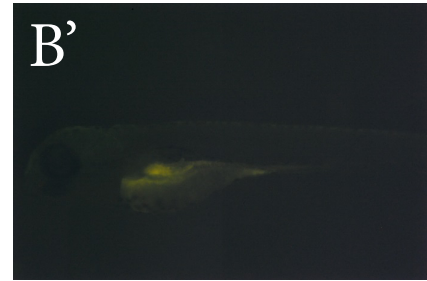

As<sup>3+</sup>  
0.0002 mg/L

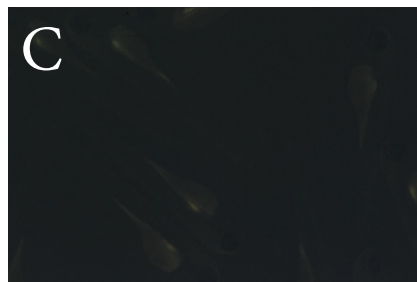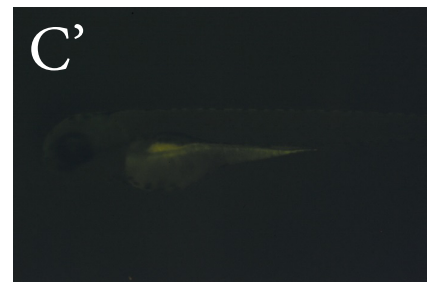

Pb<sup>2+</sup>  
0.0002 mg/L

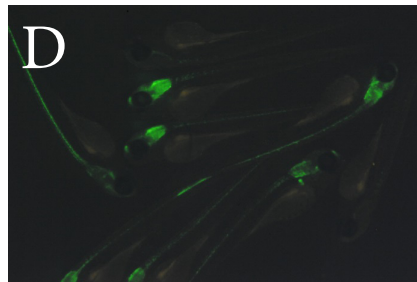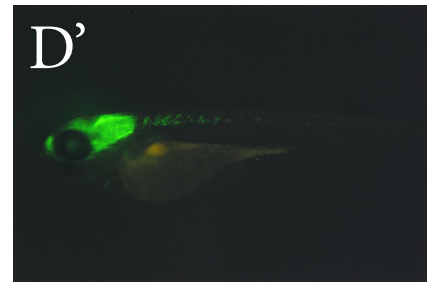

Mix  
0.0002 mg/L

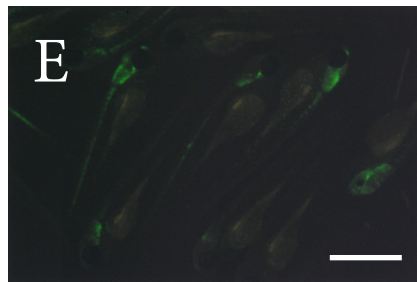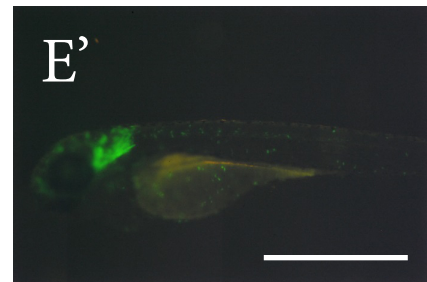

Supplement: pone.0090160.s002.pdf [file pone.0090160.s002.pdf]
