# Supplementary material for: Zebrafish Transgenic Line huORFZ Is an Effective Living Bioindicator for Detecting Environmental Toxicants
Source: PubMed Central journal article supplement (PMC3940833; doi:10.1371/journal.pone.0090160), 2014-03-03

Control

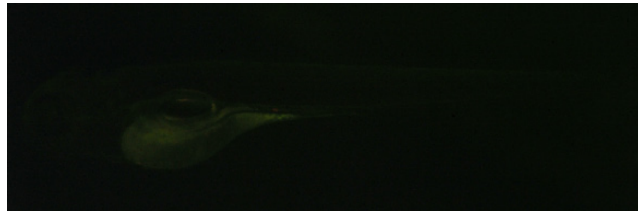

Sample 1

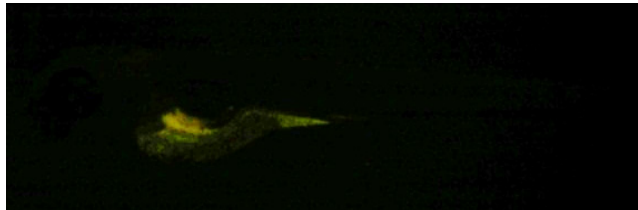

Sample 2

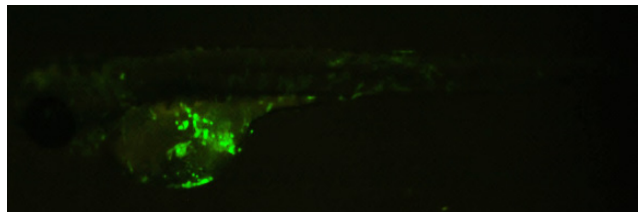

Sample 3

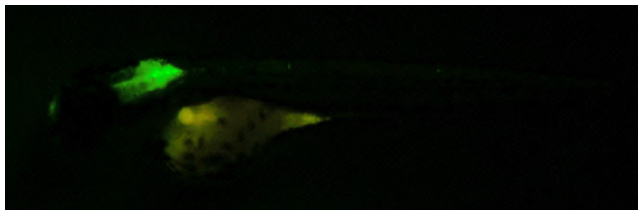

Sample 4

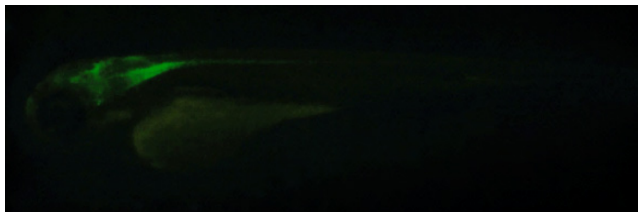

Supplement: pone.0090160.s003.pdf [file pone.0090160.s003.pdf]
